# Supplementary material for: Synthesis and characterization of axial heterojunction inorganic–organic semiconductor nanowire arrays
Source: Royal Society of Chemistry journal article supplement (doi:10.1039/c1dt10926j), 2011-01-01
Supplement: c1dt10926j.pdf [file c1dt10926j.pdf]

## Supporting information for:

### Synthesis and characterization of axial heterojunction inorganic/organic semiconductor nanowire arrays†

Nan Chen,<sup>a,b</sup> Xuemin Qian,<sup>a</sup> Haowei Lin,<sup>a</sup> Huibiao Liu,<sup>a</sup> Yongjun Li<sup>a</sup> and Yuliang Li<sup>\*a</sup>

<sup>a</sup> CAS Key Laboratory of Organic Solids, Beijing National Laboratory for Molecular Sciences (BNLMS), Institute of Chemistry, Chinese Academy of Sciences, Beijing, 100190, P. R. China

<sup>b</sup> Graduate University of Chinese Academy of Sciences, Beijing, 100190, P.R. China. E-mail: ylli@iccas.ac.cn

† Electronic Supplementary Information (ESI) available: [details of any supplementary information available should be included here]. See DOI: 10.1039/b000000x/

## Supporting Figures

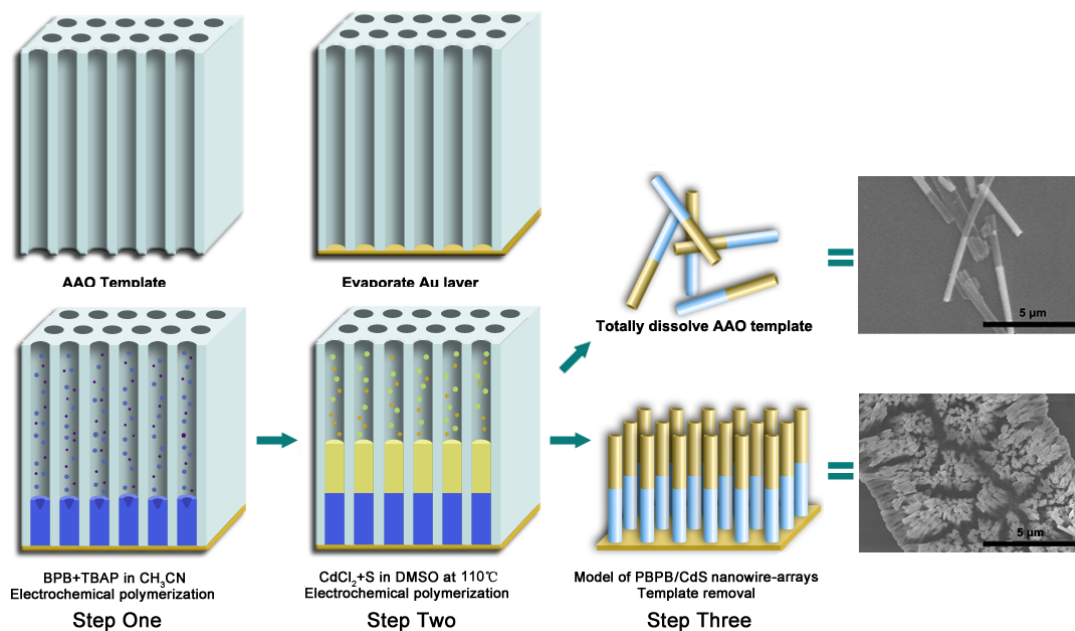

**Figure S1.** The detailed synthesis procedure of PBPB/CdS heterojunction nanowire arrays

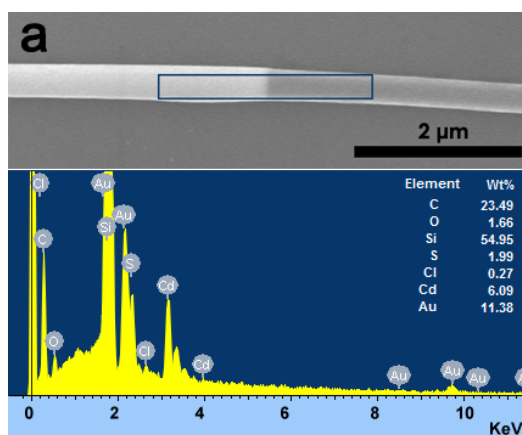

**Figure S2.** Energy-dispersive X-microanalysis (EDS) of PBPB/CdS heterojunction nanowire on silicon substrates (a), the nanowire was coated with gold. The analysis of EDS was shown that there were C (Wt%, 23.49), O (1.66), S (1.99), Cl (0.27) and Cd (6.09) in the PBPB/CdS nanowire.

From the Figure S2a (the linear scanning) we can conclude that the left half of the PBPB/CdS nanowire was constituted of PBPB, and the other half was CdS. While the EDS of the PBPB/CdS nanowire was also done to identify the elements in the nanowire.

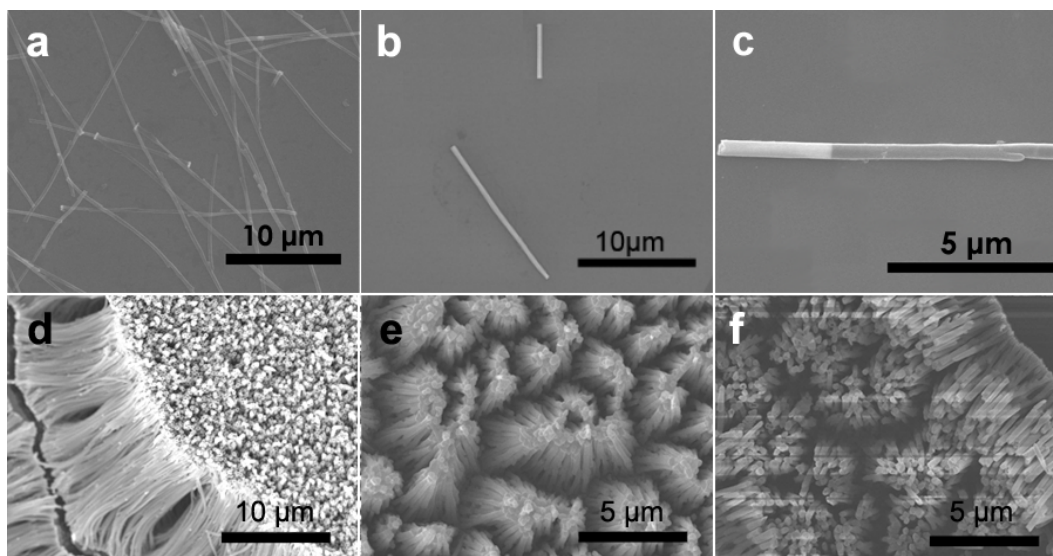

**Figure S3.** SEM image of individual PBPB nanowires (a) and nanowire arrays (d); SEM image of individual CdS nanowires (b) and nanowire arrays (e); SEM image of PBPB/CdS heterojunction nanowire (c) and nanowire arrays (f).

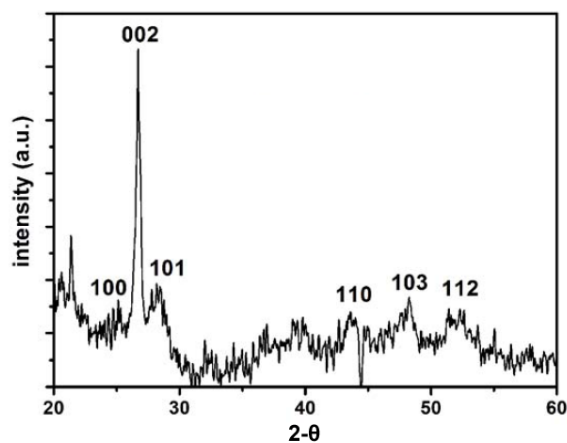

**Figure S4** X-ray diffraction patterns (XRD) of the heterojunction nanowires

The XRD patterns for the heterojunction nanowires are shown in **Figure S4**. All of the peaks can be assigned to [100], [002], [101], [110], [103] and [112] planes of wurtzite structure CdS. It is found that the [002] peak of wurtzite CdS is the dominant in XRD patterns. This information corresponding to the conclusion of HRTEM indicates that the nanowire is composed by the wurtzite structure CdS, which mainly grows along [100] direction.

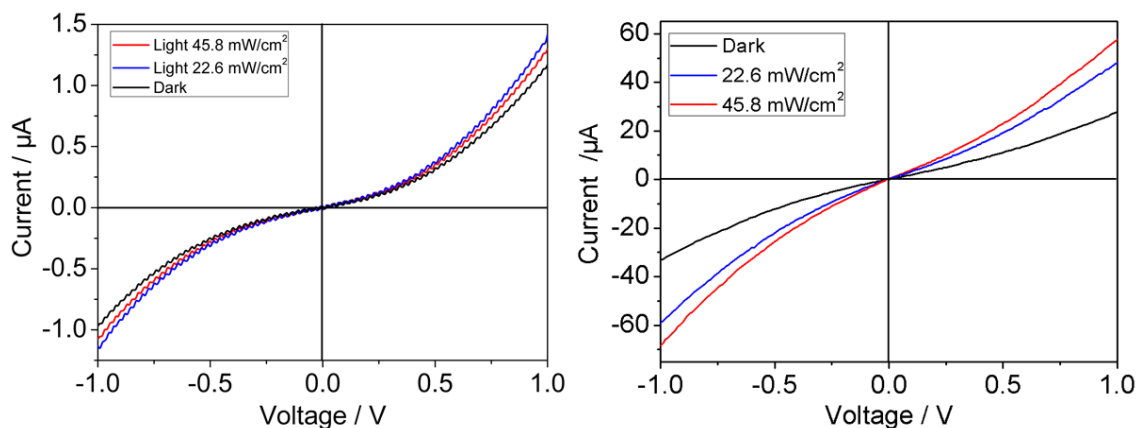

**Figure S5.** Typical  $I$ - $V$  curves of PBPB nanowire arrays in dark and under illumination (22.6 $\text{mW}/\text{cm}^2$  and 45.8 $\text{mW}/\text{cm}^2$ ) (a); Typical  $I$ - $V$  curves of CdS nanowire arrays in dark and under illumination (22.6 $\text{mW}/\text{cm}^2$  and 45.8 $\text{mW}/\text{cm}^2$ ) (b).

From the **Figure S5** we can calculate the conductivity of PBPB and CdS nanowire arrays, the conductivity of PBPB nanowire arrays was about  $1 \times 10^{-4}$  S/cm under different illumination intensity; and the conductivity of CdS nanowire arrays was  $2.6 \times 10^{-4}$  S/cm in the dark,  $5.0 \times 10^{-4}$  S/cm under 22.6 $\text{mW}/\text{cm}^2$  and  $6.7 \times 10^{-4}$  S/cm under 45.8 $\text{mW}/\text{cm}^2$ , respectively.

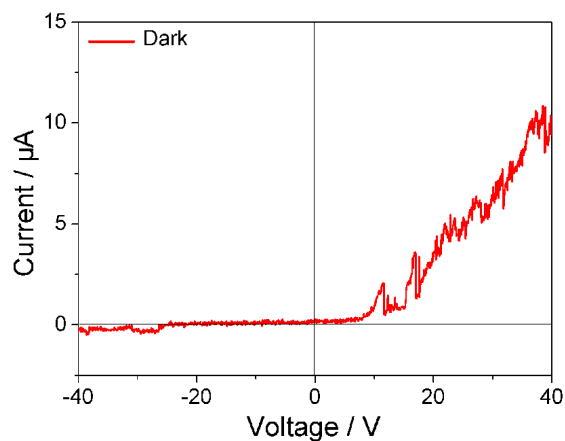

**Figure S6.** Typical  $I$ - $V$  curves of PBPB/CdS heterojunction nanowire in dark.
